# Supplementary material
Source: PubMed Central journal article supplement (PMC1978130)

## Supplementary Material

Distribution of the temperature factors along the  $\alpha$ -carbon trace of the SARS-CoV M<sup>PRO</sup> monomer present in the asymmetric unit (2C3S, this work). The color coding scheme is defined in the bar. Five flexible regions including the oxyanion binding loop (residue Gly-138-Gly-145) are labelled.

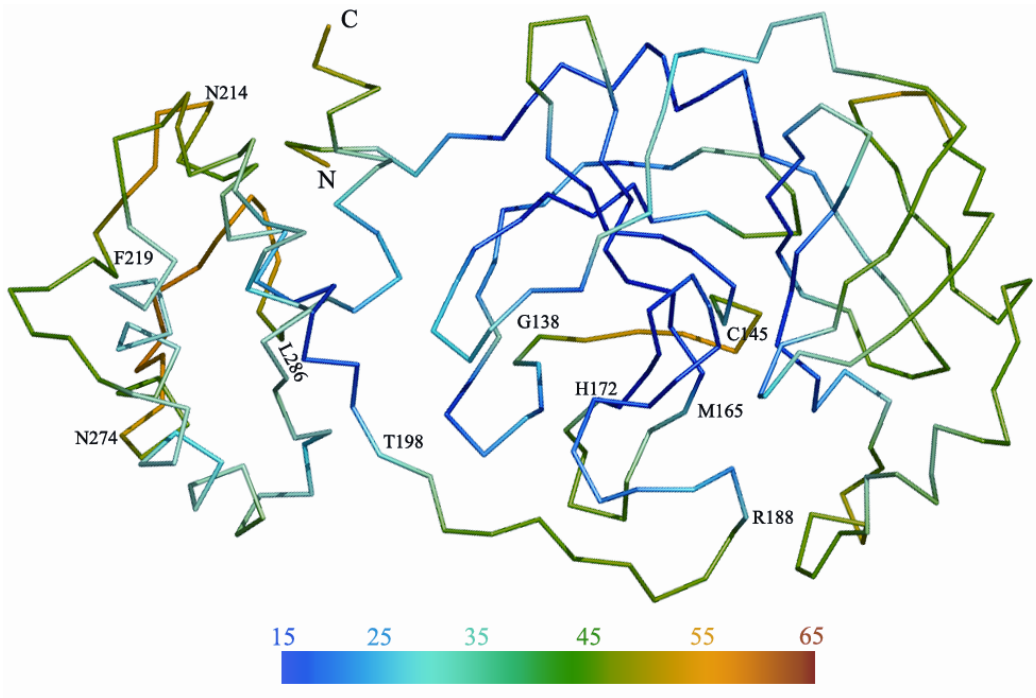

Supplement: f-61-00964-sup1.pdf [file f-61-00964-sup1.pdf]
